# Supplementary material for: Breathable and Stretchable Organic Electrochemical Transistors with Laminated Porous Structures for Glucose Sensing
Source: MDPI journal article supplement (doi:10.3390/s23156910), 2023-08-03
Supplement: s1 [file s1]

## **Supporting Information**

# **Breathable and stretchable organic electrochemical transistors with laminated porous structures for glucose sensing**

Haihong Guo, Changjian Liu, Yujie Peng, Lin Gao, Junsheng Yu \*

State Key Laboratory of Electronic Thin Films and Integrated Devices, School of Optoelectronic Science and Engineering, University of Electronic Science and Technology of China (UESTC), Chengdu 610054, China; 202221050501@std.uestc.edu.cn (H.G.); 202121050109@std.uestc.edu.cn (C.L.); 202211050804@std.uestc.edu.cn (Y.P.); 202111050704@std.uestc.edu.cn (L.G.)

\* Correspondence: jsyu@uestc.edu.cn

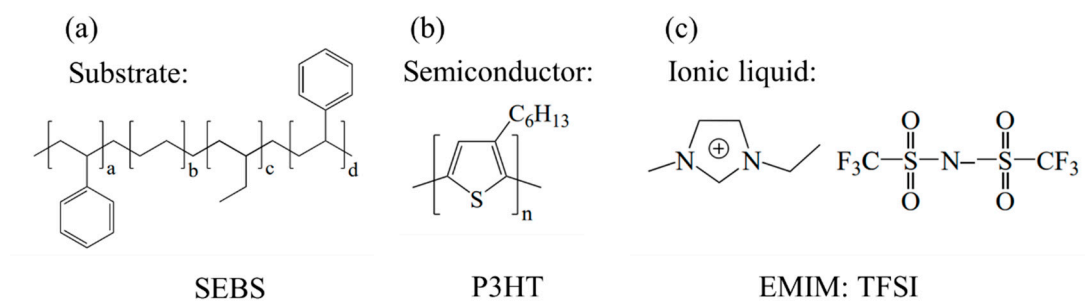

**Figure S1.** The molecular structures of P3HT, SEBS and EMIM: TFSI.

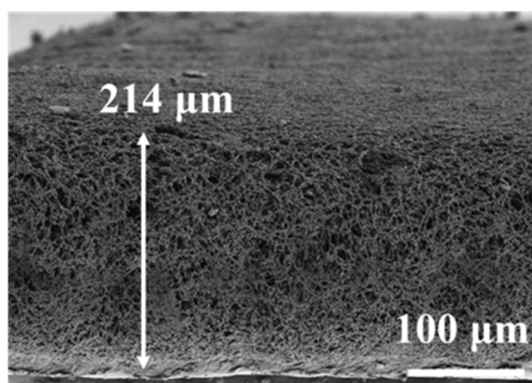

**Figure S2.** The Cross-sectional SEM image of SEBS substrate.

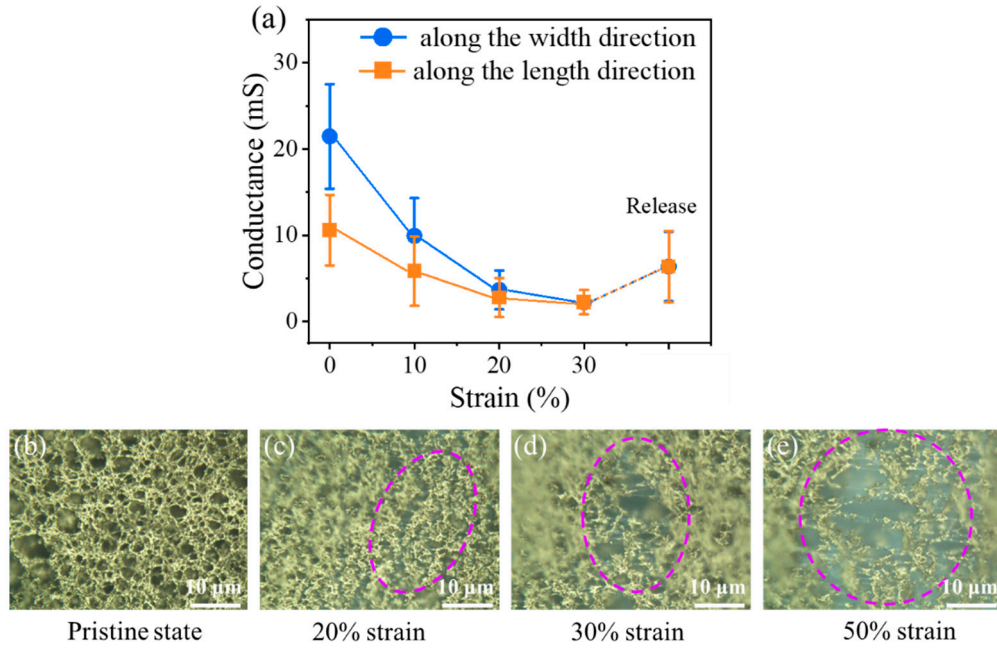

**Figure S3.** Mechanical characteristics of Au electrodes. (a) Conductance of porous network Au electrodes under different strains (10%, 20%, 30% strain and release) along the channel length and width directions; (b-e) the optical images of porous network Au electrodes under different strains (0%, 20%, 30% and 50% strain).

**Table S1.** Conductance of porous network Au electrodes under different strains.

| Direction of strain | Tensile strength (%) | Conductance (mS) |
|---------------------|----------------------|------------------|
| Length direction    | 0                    | 10.61±4.1        |
|                     | 10                   | 5.85±4.02        |
|                     | 20                   | 2.79±2.26        |
|                     | 30                   | 2.26±1.43        |
|                     | Release              | 6.38±4.15        |
| Width direction     | 0                    | 21.47±6.05       |
|                     | 10                   | 9.95±4.37        |
|                     | 20                   | 3.67±2.26        |
|                     | 30                   | 2.23±0.41        |
|                     | release              | 6.39±4.03        |

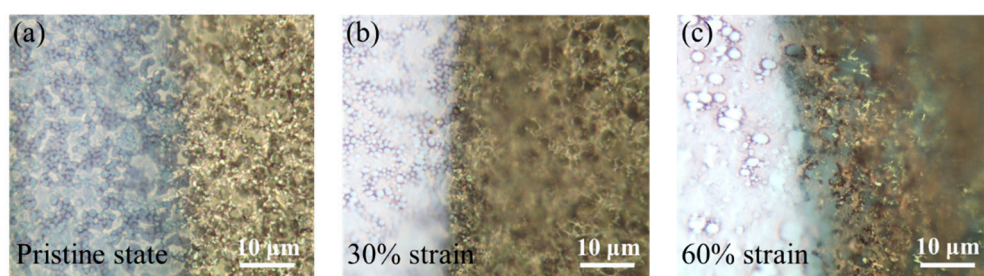

**Figure S4.** The optical images of the interface between P3HT/SEBS film and Au electrode under 0%, 30% and 60% strain.
